# Supplementary material for: The synthesis, characterization, and theoretical analysis of (NH4)3PbCl5
Source: Royal Society of Chemistry journal article supplement (doi:10.1039/d0nj05771a), 2020-12-26

## Electronic Supplementary Information

### Synthesis, characterization, and theoretical analysis of $(\text{NH}_4)_3\text{PbCl}_5$

Liang Zhu,<sup>a,b</sup> Wenqi Jin,<sup>a,b</sup> Zhihua Yang,<sup>a,b</sup> Yun Yang,<sup>a,b\*</sup> Shilie Pan<sup>a,b\*</sup>

<sup>a</sup>CAS Key Laboratory of Functional Materials and Devices for Special Environments; Xinjiang Technical Institute of Physics & Chemistry, CAS; Xinjiang Key Laboratory of Electronic Information Materials and Devices, 40-1 South Beijing Road, Urumqi 830011, China.

<sup>b</sup>Center of Materials Science and Optoelectronics Engineering, University of Chinese Academy of Sciences, Beijing 100049, China.

\*Corresponding author: slpan@ms.xjb.ac.cn.

**Table S1.** Atomic coordinates ( $\times 10^4$ ), equivalent isotropic displacement parameters ( $\text{\AA}^2 \times 10^3$ ) of  $(\text{NH}_4)_3\text{PbCl}_5$ .  $U(\text{eq})$  is defined as one third of the trace of the orthogonalized  $U_{ij}$  tensor.

| Atoms | $x$        | $y$        | $z$        | $U(\text{eq})$ |
|-------|------------|------------|------------|----------------|
| Pb(1) | 5804.8(3)  | 7500       | 6531.7(3)  | 26.32(14)      |
| N(1)  | 4224(7)    | 7500       | 1479(6)    | 16.9(12)       |
| N(2)  | 2564(6)    | 5467(3)    | 4645(6)    | 39.5(12)       |
| Cl(1) | 2789(2)    | 7500       | 5217(2)    | 26.9(4)        |
| Cl(2) | 6138.9(18) | 8782.4(9)  | 3719.9(16) | 31.2(3)        |
| Cl(3) | 4431(2)    | 8793.9(11) | 8244.1(17) | 40.5(4)        |
| H(1A) | 4395       | 7500       | 448        | 20             |
| H(1B) | 3208       | 7500       | 1667       | 20             |
| H(1C) | 4642       | 7959       | 1903       | 20             |
| H(2A) | 2553       | 5361       | 3613       | 47             |
| H(2B) | 3401       | 5216       | 5083       | 47             |
| H(2C) | 1680       | 5267       | 5083       | 47             |
| H(2D) | 2626       | 6022       | 4801       | 47             |

**Table S2.** Selected bond lengths (Å) and angles (deg.) for (NH<sub>4</sub>)<sub>3</sub>PbCl<sub>5</sub>.

|                    |            |                  |       |
|--------------------|------------|------------------|-------|
| Pb(1)-Cl(1)#1      | 3.2220(27) | N(1)-H(1A)       | 0.885 |
| Pb(1)-Cl(2)        | 3.1396(23) | N(1)-H(1B)       | 0.872 |
| Pb(1)-Cl(2)#2      | 3.1396(23) | N(1)-H(1C)       | 0.883 |
| Pb(1)-Cl(3)        | 2.7619(22) | N(1)-H(1C)#4     | 0.883 |
| Pb(1)-Cl(3)#3      | 2.7619(22) | N(2)-H(2A)       | 0.890 |
| Pb(1)-Cl(1)        | 2.7768(26) | N(2)-H(2B)       | 0.891 |
| H(1A)-N(1)-H(1C)   | 109.6      | N(2)-H(2C)       | 0.891 |
| H(1B)-N(1)-H(1C)   | 108.6      | N(2)-H(2D)       | 0.889 |
| H(1A)-N(1)-H(1B)   | 110        | H(2A)-N(2)-H(2B) | 109.5 |
| H(1A)-N(1)-H(1C)#4 | 109.6      | H(2A)-N(2)-H(2C) | 109.5 |
| H(1B)-N(1)-H(1C)#4 | 108.6      | H(2B)-N(2)-H(2C) | 109.4 |
| H(1C)-N(1)-H(1C)#4 | 110.5      | H(2A)-N(2)-H(2D) | 109.4 |
| H(2C)-N(2)-H(2D)   | 109.7      | H(2B)-N(2)-H(2D) | 109.3 |

Symmetry transformations used to generate equivalent atoms:

#1 0.5+x,1.5-y,1.5-z    #2x,1.5-y,z    #3 x, 1.5-y,z    #4x,1.5-y,z

**Table S3.** Hydrogen bond lengths (Å) and angles (°) for (NH<sub>4</sub>)<sub>3</sub>PbCl<sub>5</sub>. D, hydrogen bond donor; A, hydrogen bond acceptor.

| <b>D-H···A</b>             | <b>d<sub>(D-H)</sub></b> | <b>d<sub>(H···A)</sub></b> | <b>d<sub>(D···A)</sub></b> | <b>∠ (DHA)</b> |
|----------------------------|--------------------------|----------------------------|----------------------------|----------------|
| <b>N(1)-H(1A) ···Cl(3)</b> | 0.885                    | 2.769                      | 3.4230                     | 131.820        |
| <b>N(1)-H(1B) ···Cl(2)</b> | 0.872                    | 2.695                      | 3.3028                     | 127.919        |
| <b>N(1)-H(1C) ···Cl(2)</b> | 0.883                    | 2.378                      | 3.2122                     | 157.640        |
| <b>N(2)-H(2A) ···Cl(2)</b> | 0.890                    | 2.676                      | 3.3123                     | 129.381        |
| <b>N(2)-H(2B) ···Cl(2)</b> | 0.891                    | 2.513                      | 3.1944                     | 133.798        |
| <b>N(2)-H(2C) ···Cl(3)</b> | 0.891                    | 2.794                      | 3.3976                     | 126.216        |
| <b>N(2)-H(2D) ···Cl(1)</b> | 0.889                    | 2.367                      | 3.2552                     | 179.955        |

**Figure S1.** Asymmetric unit of  $(\text{NH}_4)_3\text{PbCl}_5$ .

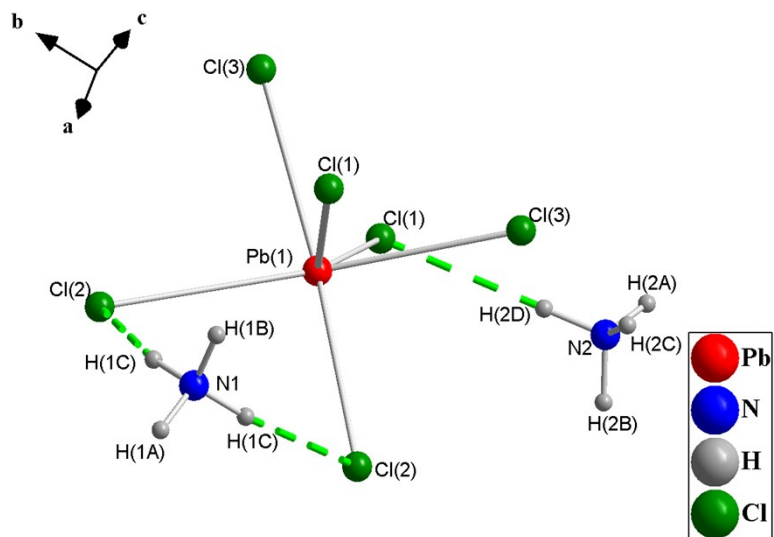

**Figure S2.** The hydrogen bonds and their connect environments in  $(\text{NH}_4)_3\text{PbCl}_5$ .

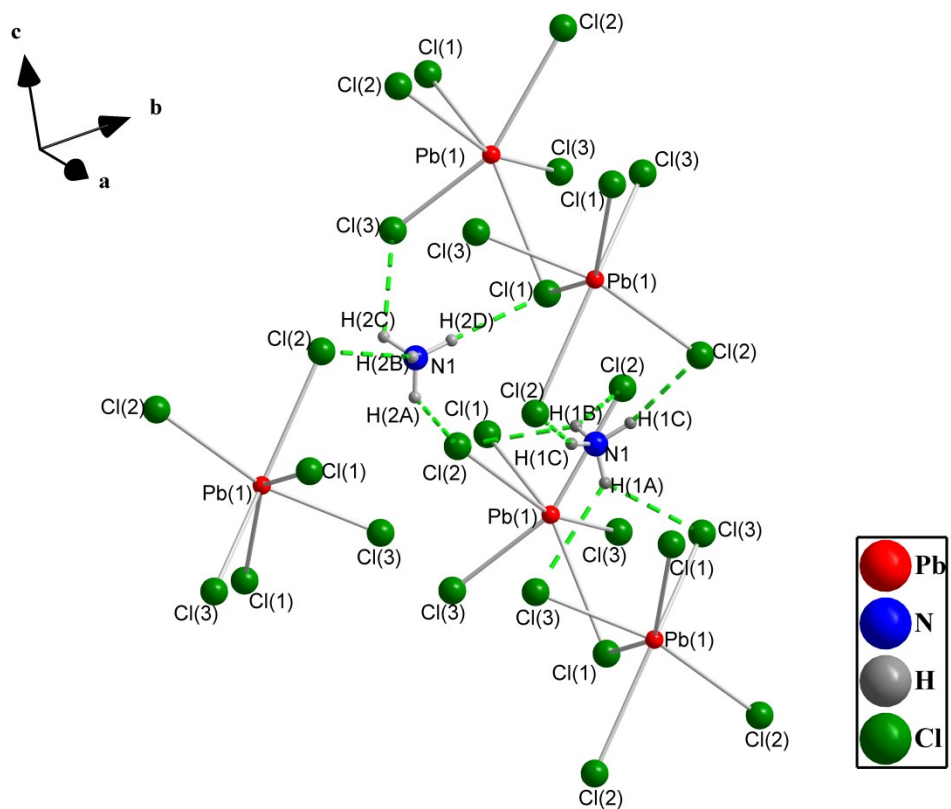

**Figure S3.** The  $[\text{N}_2\text{H}_8\text{Cl}_9]^{7-}$  dimer (a) and  $[\text{Rb}_2\text{Cl}_{14}]^{12-}$  dimer (b).

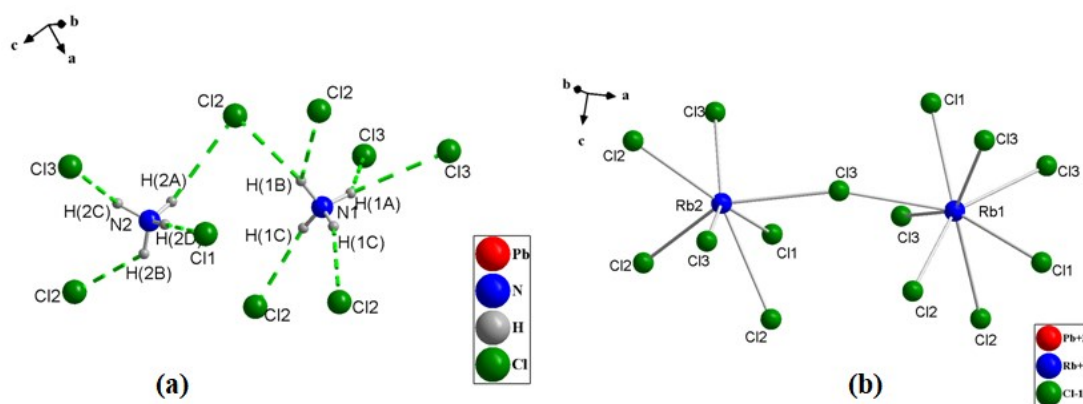

**Figure S4.** IR spectroscopy of  $(\text{NH}_4)_3\text{PbCl}_5$ .

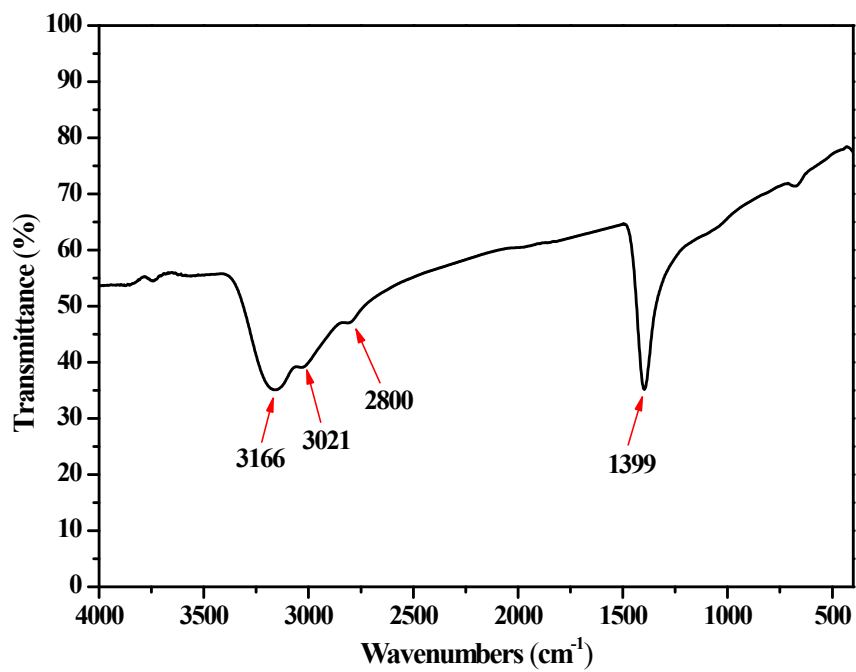



**Figure S5.** UV-Vis-NIR diffuse reflectance spectrum of  $(\text{NH}_4)_3\text{PbCl}_5$ .

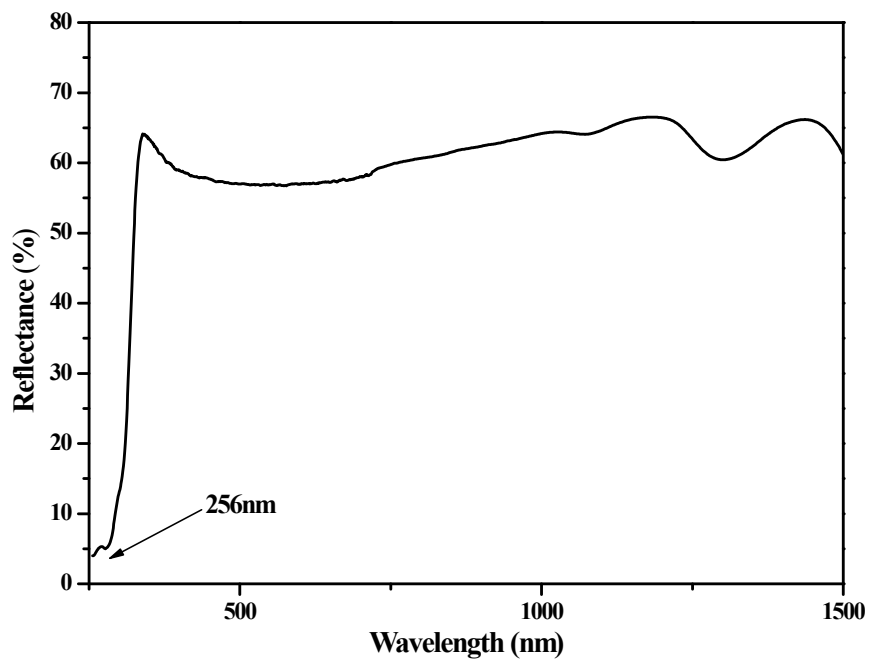

**Figure S6.** Thermal stability.

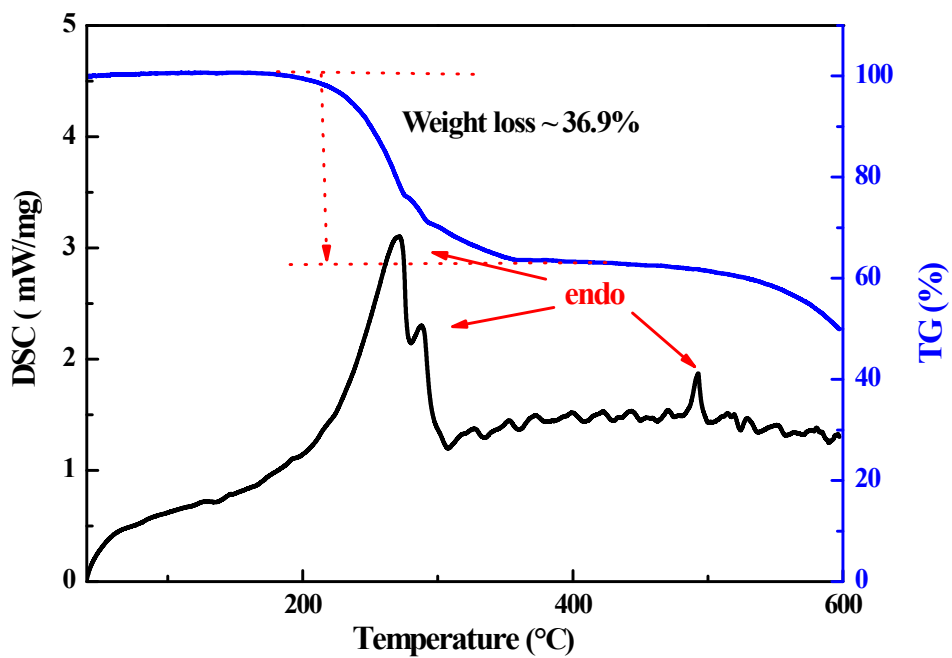

**Figure S7.** Electron localization function diagram of the [Pb-Cl] polyhedra in  $(\text{NH}_4)_3\text{PbCl}_5$ .

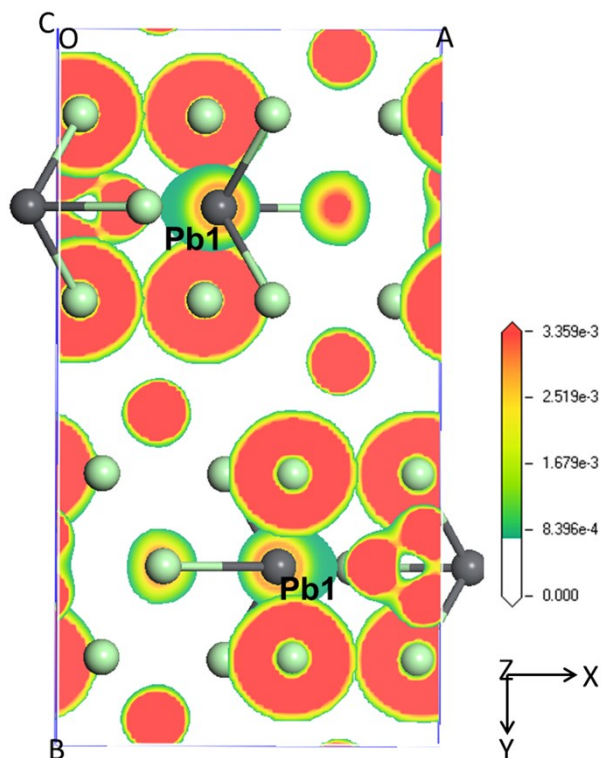

Supplement: d0nj05771a1.pdf [file d0nj05771a1.pdf]
